# Supplementary material
Source: publisher site journal article supplement (https://www.dovepress.com/article/373183)
Supplement: Supplementary file 1 [file get_supplementary_file.php]

Supplemental table 1. Multivariate logistic regression model assessing association between factors and reporting any COVID-19 symptom

| **Odds Ratio Estimates** | | | |  |
| --- | --- | --- | --- | --- |
| **Factor** | **Point Estimate** | **95%  Confidence Limits** | | **P-value** |
| Vaccination status at the time of infection |  |  |  | 0.13 |
| Unvaccinated | Reference |  |  |  |
| Fully vaccinated | 0.74 | 0.42 | 1.31 |  |
| Partially vaccinated | 1.47 | 0.94 | 2.29 |  |
| Age group (years) |  |  |  | <0.01 |
| 18-29 | Reference |  |  |  |
| 30-39 | 1.09 | 0.78 | 1.52 |  |
| 40-49 | 1.24 | 0.87 | 1.77 |  |
| 50-59 | 0.86 | 0.60 | 1.23 |  |
| 60+ | 0.62 | 0.43 | 0.91 |  |
| Gender: female vs. male | 1.55 | 1.15 | 2.09 | <0.01 |
| Education |  |  |  | 0.01 |
| High school or less | Reference |  |  |  |
| Some college | 0.93 | 0.66 | 1.32 |  |
| 4-yr college degree | 0.72 | 0.50 | 1.04 |  |
| >4yr college degree | 0.60 | 0.42 | 0.87 |  |
| Race: Black or African American vs. White | 1.25 | 0.79 | 1.99 | 0.34 |
| Ethnicity: non-Hispanic/Latino vs. Hispanic/Latino | 0.91 | 0.64 | 1.29 | 0.60 |
| BMI category |  |  |  | 0.21 |
| Underweight/normal weight | Reference |  |  |  |
| Overweight | 0.80 | 0.59 | 1.08 |  |
| Obese | 0.75 | 0.56 | 1.00 |  |
| Severe obesity | 0.92 | 0.63 | 1.34 |  |
| Smoker: yes vs. no | 1.18 | 0.79 | 1.75 | 0.42 |
| Influenza vaccination status: yes vs. no | 0.58 | 0.46 | 0.73 | <.0001 |
| On cancer treatment: yes vs. no | 1.29 | 0.37 | 4.57 | 0.69 |
| Any history of other medical conditions: yes vs. no | 1.47 | 1.17 | 1.83 | 0.00 |

Supplemental table 2. Multivariate logistic regression model assessing association between factors and reporting any moderate/severe COVID-19 symptom

| **Odds Ratio Estimates** | | | |  |
| --- | --- | --- | --- | --- |
| **Factor** | **Point Estimate** | **95%  Confidence Limits** | | **P-value** |
| Vaccination status at the time of infection |  |  |  | 0.24 |
| Unvaccinated | Reference |  |  |  |
| Fully vaccinated | 0.30 | 0.07 | 1.26 |  |
| Partially vaccinated | 0.88 | 0.51 | 1.54 |  |
| Age group |  |  |  | <.0001 |
| 18-29 | Reference |  |  |  |
| 30-39 | 1.61 | 0.97 | 2.66 |  |
| 40-49 | 2.40 | 1.46 | 3.94 |  |
| 50-59 | 2.33 | 1.38 | 3.92 |  |
| 60+ | 2.89 | 1.68 | 4.98 |  |
| Gender: female vs. male | 1.13 | 0.73 | 1.75 | 0.59 |
| Education |  |  |  | 0.10 |
| High school or less | Reference |  |  |  |
| Some college | 0.75 | 0.53 | 1.07 |  |
| 4-yr college degree | 0.58 | 0.38 | 0.90 |  |
| >4yr college degree | 0.68 | 0.44 | 1.03 |  |
| Race: Black or African American vs. White | 0.85 | 0.50 | 1.44 | 0.55 |
| Ethnicity: non-Hispanic/Latino vs. Hispanic/Latino | 0.93 | 0.59 | 1.48 | 0.77 |
| BMI category |  |  |  | 0.16 |
| Underweight/normal weight | Reference |  |  |  |
| Overweight | 0.72 | 0.50 | 1.05 |  |
| Obese | 0.73 | 0.52 | 1.04 |  |
| Severe obesity | 0.98 | 0.64 | 1.49 |  |
| Smoker: yes vs. no | 1.16 | 0.78 | 1.75 | 0.46 |
| Influenza vaccination status: yes vs. no | 0.85 | 0.65 | 1.13 | 0.26 |
| On cancer treatment: yes vs. no | 1.47 | 0.42 | 5.19 | 0.55 |
| Any history of other medical conditions: yes vs. no | 1.14 | 0.87 | 1.51 | 0.35 |
